# Supplementary material for: Sensing of nutrients by CPT1C regulates late endosome/lysosome anterograde transport and axon growth
Source: eLife. 2019 Dec 23;8:e51063. doi: 10.7554/eLife.51063 (PMC6927751; doi:10.7554/eLife.51063)
Supplement: Figure 2—source data 1. [file elife-51063-fig2-data1.xlsx]

## Sheet: pACC_Total ACC
		pACC	Total ACC	pACC/Total ACC	mean Glucose	normalized pACC/Total ACC
WT	Glucose	1.00142	1.03789	0.964864	1.00096	0.963941
		0.971084	0.99145	0.979458		0.978521
		1.02749	0.97066	1.05855		1.05754
	w/o Glucose	0.595702	0.84936	0.701354		0.700683	* Excluded
		1.26184	0.76385	1.65194		1.65036
		1.10467	0.815515	1.35457		1.35327
KO	Glucose	1.05149	1.07257	0.980345	1.00008	0.980267
		0.906309	0.944959	0.959099		0.959022
		1.04221	0.982474	1.0608		1.06071
	w/o Glucose	0.910989	0.638435	1.42691		1.4268
		1.2169	0.740359	1.64367		1.64354
		1.52266	1.10068	1.38337		1.38326
		pACC	Total ACC	pACC/Total ACC	mean Glucose	normalized pACC/Total ACC
WT	Glucose	1.16756	1.12752	1.03551	0.992457	1.04338
		1.07811	1.02287	1.054		1.06201
		0.754329	0.849607	0.887855		0.894603
	AICAR	1.20195	0.670913	1.79152		1.80514
		1.53988	1.02004	1.50963		1.52111
		1.39432	0.944204	1.47672		1.48794
KO	Glucose	1.10066	1.08212	1.01713	1.00649	1.01058
		0.918024	0.842148	1.0901		1.08307
		0.981316	1.07573	0.91223		0.906351
	AICAR	1.17632	0.897444	1.31074		1.3023
		1.11487	0.913172	1.22087		1.213
		1.47314	0.707648	2.08174		2.06832
