# Supplementary material for: Sensing of nutrients by CPT1C regulates late endosome/lysosome anterograde transport and axon growth
Source: eLife. 2019 Dec 23;8:e51063. doi: 10.7554/eLife.51063 (PMC6927751; doi:10.7554/eLife.51063)
Supplement: Figure 3—source data 1. [file elife-51063-fig3-data1.xlsx]

## Sheet: % of FRET
% FRET CPT1C with:				% FRET Protrudin with:
KDEL	Calnex	TUB	ATL-1	ATL-1	CPT1C
4.01	2.8	0	16.65	10.59	20.33
1.69	5.15	1.85	8.82	11.83	13.24
0	4	3.53	10.96	8.4	12.85
1.1	3.24	0.07	7.18	16.98	8.85
3.96	4.55	1.68	10.21	7.95	9.63
2.89	5.35		14.06	14.58	13.1
2.84	6.6		15.62	6.96	15.58
2.9	5.9		16.84	9.64	9.98
0.66	5.75		15.47		12.43
	2.72		22.31
	6.65
