# Supplementary material for: Sensing of nutrients by CPT1C regulates late endosome/lysosome anterograde transport and axon growth
Source: eLife. 2019 Dec 23;8:e51063. doi: 10.7554/eLife.51063 (PMC6927751; doi:10.7554/eLife.51063)
Supplement: Figure 3—source data 2. [file elife-51063-fig3-data2.xlsx]

## Sheet: pACC_Total ACC
	normalized pACC/Total ACC
Glucose	0.991835
	0.970773
	1.03739
w/o Glucose	3.69145
	3.92426
	3.35489
