# Supplementary material for: Sensing of nutrients by CPT1C regulates late endosome/lysosome anterograde transport and axon growth
Source: eLife. 2019 Dec 23;8:e51063. doi: 10.7554/eLife.51063 (PMC6927751; doi:10.7554/eLife.51063)
Supplement: Figure 3—source data 3. [file elife-51063-fig3-data3.xlsx]

## Sheet: % of FRET
CPT1C-Protrudin
Glucose	w/o Glucose
15.26	12.6
13.56	14.93
6.19	12.09
6.45	8.31
16.19	6.97
19.31	12.09
13.14	12.5
13.5	16.01
18	9.48
11.48
