# Supplementary material for: Sensing of nutrients by CPT1C regulates late endosome/lysosome anterograde transport and axon growth
Source: eLife. 2019 Dec 23;8:e51063. doi: 10.7554/eLife.51063 (PMC6927751; doi:10.7554/eLife.51063)
Supplement: Figure 3—source data 4. [file elife-51063-fig3-data4.xlsx]

## Sheet: CPT1C CoIP_Protrudin IP
		CPT1C CoIP	Protrudin IP	CPT1C CoIP/Protrudin IP	mean vehicle	normalized CPT1C CoIP/Protrudin IP
Experiment 1	vehicle_1	15063711	13545610	1.11207	0.863281	1.28819
	TOFA_1	8721740	13667933	0.638117		0.739177
	vehicle_2	18671660	17918154	1.04205		1.20708
	TOFA_2	12700711	17597447	0.721736		0.836039
	vehicle_3	8490497	16231033	0.523103		0.605947
	TOFA_3	13670225	12715619	1.07507		1.24533
	vehicle_4	14737033	17148589	0.859373		0.995473
	TOFA_4	11514104	18112983	0.635682		0.736356
	vehicle_5	9265882	11882347	0.779802		0.903301
	TOFA_5	5542125	16265196	0.340735		0.394698
Experiment 2	vehicle_1	10250690	7287861	1.40654	1.14091	1.23282
	TOFA_1	10493619	13986539	0.750266		0.6576
	vehicle_2	12130912	15008497	0.80827		0.70844
	TOFA_2	14104376	15315619	0.920915		0.807172
	vehicle_3	9032255	9039154	0.999237		0.875821
	TOFA_3	14948154	13430841	1.11297		0.975509
	vehicle_4	12021083	8907083	1.34961		1.18292
	TOFA_4	18647903	17872439	1.04339		0.91452

## Sheet: summary
CPT1C CoIP/Protrudin IP
vehicle	TOFA
1.28819	0.739177
1.23282	0.6576
1.20708	0.836039
0.70844	0.807172
0.605947	1.24534
0.875821	0.975509
0.995473	0.736356
1.18292	0.91452
0.903301	0.394698
