# Supplementary material for: Sensing of nutrients by CPT1C regulates late endosome/lysosome anterograde transport and axon growth
Source: eLife. 2019 Dec 23;8:e51063. doi: 10.7554/eLife.51063 (PMC6927751; doi:10.7554/eLife.51063)
Supplement: Figure 4—source data 1. [file elife-51063-fig4-data1.xlsx]

## Sheet: Malonyl_CoA
		biological replicates	technical replicates	mean
Experiment 1	EV_ vehicle	EV_1	5.35714	5.20132
			5.04551
		EV_2	4.76299	4.82825
			4.89351
		EV_3	5.98528	6.00908
			6.03288
	CPT1C_vehicle	C_1	10.192	10.1994
			10.2069
		C_2	9.66352	9.16292
			8.66232
		C_3	10.9175	10.6756
			10.4338
	M589S_vehicle	M_1	5.17638	5.11304
			5.04969
		M_2	4.94741	4.65624
			4.36506
		M_3	3.2794	3.28137
			3.28335
	EV_TOFA	EV_T_1	2.59659	2.72152
			2.84645
		EV_T_2	1.52757	1.49698
			1.46639
		EV_T_3	1.3442	1.19568
			1.04717
	CPT1C_TOFA	C_T_1	3.02923	3.08492
			3.14062
		C_T_2	1.36361	1.42905
			1.49448
		C_T_3	1.18447	1.31455
			1.44462
	M589S_TOFA	M_T_1	1.7411	1.42846
			1.11582
		M_T_2	0.791807	0.719624
			0.64744
		M_T_3	N/A
			N/A
		biological replicates	technical replicates	mean
Experiment 2	EV_ vehicle	EV_1	7.16388	7.14606
			7.12823
		EV_2	7.486	7.51858
			7.55115
		EV_3	9.34424	9.07006
			8.79587
	CPT1C_vehicle	C_1	11.2678	11.2874
			11.307
		C_2	16.1609	16.4882
			16.8155
		C_3	13.2051	13.7035
			14.2019
	M589S_vehicle	M_1	4.26993	4.01187
			3.75381
		M_2	5.27266	4.86977
			4.46687
		M_3	5.13701	4.8921
			4.64719
	EV_TOFA	EV_T_1	1.53041	1.34323
			1.15605
		EV_T_2	1.26473	1.13736
			1.01
		EV_T_3	0.888196	0.7487
			0.609205
	CPT1C_TOFA	C_T_1	1.33238	1.4443
			1.55622
		C_T_2	N/A
			N/A
		C_T_3	0.577928	0.545787
			0.513645
	M589S_TOFA	M_T_1	0.941145	1.21129
			1.48143
		M_T_2	0.758157	0.783428
			0.808698
		M_T_3	N/A
			N/A

## Sheet: summary
	vehicle						TOFA
EV	5.20132	4.82825	6.00908	7.14606	7.51858	9.07006	2.72152	1.49698	1.19568	1.34323	1.13736	0.7487
CPT1C	10.1994	9.16292	10.6756	11.2874	16.4882	13.7035	3.08493	1.42904	1.31455	1.4443	0.545787
M589S	5.11304	4.65624	3.28138	4.01187	4.86977	4.8921	1.42846	0.719624	1.21129	0.783428
