# Supplementary material for: Sensing of nutrients by CPT1C regulates late endosome/lysosome anterograde transport and axon growth
Source: eLife. 2019 Dec 23;8:e51063. doi: 10.7554/eLife.51063 (PMC6927751; doi:10.7554/eLife.51063)
Supplement: Figure 7—figure supplement 1—source data 1. [file elife-51063-fig7-figsupp1-data1.xlsx]

## Sheet: protrudin levels
	Protrudin	GAPDH	Protrudin/GAPDH	mean shscramble	normalized Prodrudin/GAPDH
shscramble	10977782	16118317	0.681075	0.738097	0.922745
	13395368	15444004	0.867351		1.17512
	11992731	18010761	0.665865		0.902137
shprotrudin	1086820	11487054	0.0946126		0.128185
	872548	13415610	0.0650398		0.0881182
	1811397	20644874	0.0877408		0.118874
