# Supplementary material for: Sensing of nutrients by CPT1C regulates late endosome/lysosome anterograde transport and axon growth
Source: eLife. 2019 Dec 23;8:e51063. doi: 10.7554/eLife.51063 (PMC6927751; doi:10.7554/eLife.51063)
Supplement: Figure 7—source data 1. [file elife-51063-fig7-data1.xlsx]

## Sheet: CPT1C CoIP_Protrudin IP
		CPT1C CoIP	Protrudin IP	KIF5B CoIP/Protrudin IP	mean EV	normalized KIF5B CoIP/Protrudin IP vs mean EV
Experiment 1	EV_1	4742874	7443966	0.637143	0.477429	1.33453
	EV_2	3561631	11210128	0.317715		0.665471
	CPT1C_1	1575347	8667602	0.181751		0.380687
	CPT1C_2	2819075	11481986	0.245522		0.514257
	CPT1C_3	3827368	11428643	0.334893		0.701449
	M589S_1	2828882	10096388	0.280188		0.586867
	M589S_2	4817125	7862530	0.612669		1.28327
	M589S_3	3454761	7967380	0.433613		0.908225
Experiment 2	EV_1	6537338	11159309	0.585819	0.615874	0.9512
	CPT1C_1	4406246	11374430	0.387382		0.628995
	M589S_1	6572610	14009037	0.469169		0.761794
	EV_2	8416803	12832966	0.655874		1.06495
	CPT1C_2	4283418	9150945	0.468085		0.760033
	M589S_2	9703874	18537886	0.523462		0.849949
	EV_3	8055045	15530643	0.518655		0.842145
	CPT1C_3	6319974	13171451	0.479824		0.779094
	M589S_3	7608167	15164108	0.501722		0.81465
	EV_4	7856459	11173258	0.703148		1.14171
	CPT1C_4	4367418	11392966	0.383343		0.622438
	M589S_4	8049217	15585815	0.516445		0.838556
Experiment 3	EV_1	4964125	13254823	0.374515	0.551272	0.679365
	CPT1C_1	3112225	10382530	0.299756		0.543754
	M589S_1	6922610	12475773	0.554884		1.00655
	EV_2	7097317	10559238	0.672143		1.21926
	CPT1C_2	5618660	14565844	0.385742		0.699731
	M589S_2	8553853	12219773	0.700001		1.26979
	EV_3	8070317	13291966	0.607158		1.10138
	CPT1C_3	5576075	9023823	0.617928		1.12091
	M589S_3	12762238	11096480	1.15012		2.0863

## Sheet: summary
KIF5B CoIP/Protrudin IP
EV	CPT1C	M589S
0.9512	0.628995	0.761794
1.06495	0.760033	0.849949
0.842144	0.779094	0.81465
1.14171	0.622438	0.838556
1.33453	0.380687	0.586867
0.665471	0.514257	1.28327
0.679365	0.701449	0.908225
1.21926	0.543754	1.00655
1.10138	0.699731	1.26979
	1.12091	2,086296*	Excluded
