# Supplementary material for: Sensing of nutrients by CPT1C regulates late endosome/lysosome anterograde transport and axon growth
Source: eLife. 2019 Dec 23;8:e51063. doi: 10.7554/eLife.51063 (PMC6927751; doi:10.7554/eLife.51063)
Supplement: Figure 9—source data 1. [file elife-51063-fig9-data1.xlsx]

## Sheet: Malonyl_CoA
	biological replicates	technical replicates	mean
vehicle	V_1	6.13408	6.32065
		6.50723
	V_2	6.05506	5.89426
		5.73347
	V_3	5.83774	5.87739
		5.91704
Malonyl_CoA	M_1	44.4147	44.8538
		45.293
	M_2	47.6299	48.0758
		48.5217
	M_3	45.9313	45.9642
		45.9971
